# Supplementary material for: The motility regulator flhDC drives intracellular accumulation and tumor colonization of Salmonella
Source: PubMed Central journal article supplement (PMC6373116; doi:10.1186/s40425-018-0490-z), 2019-02-12
Supplement: 40425_2018_490_MOESM2_ESM.pdf [file 40425_2018_490_MOESM2_ESM.pdf]

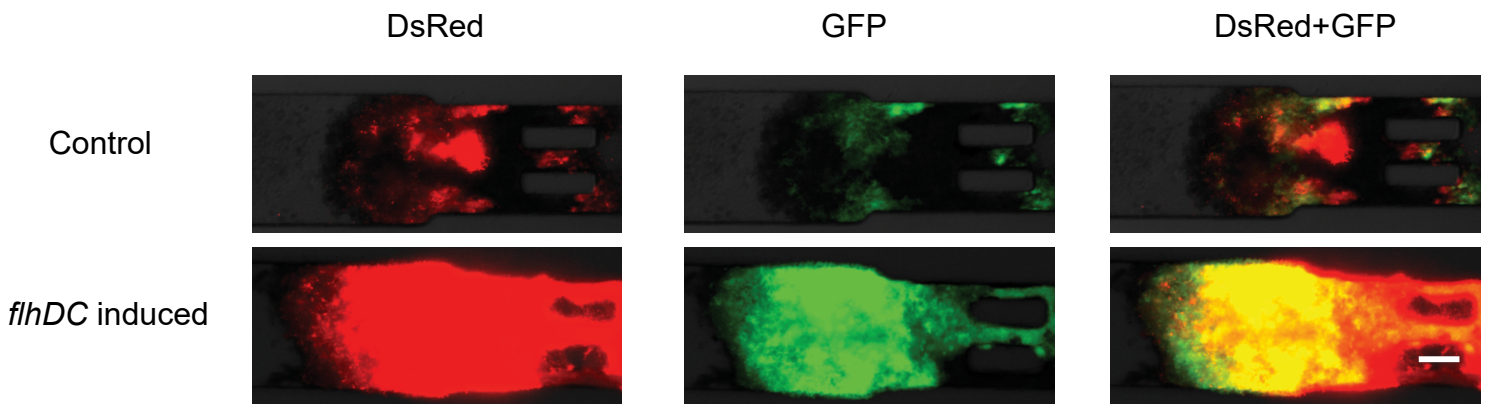

**Figure S2. Merged fluorescent images of intratumoral *Salmonella*.** Merged fluorescent images of intratumoral *Salmonella*. DsRed indicates the presence of all bacteria while GFP indicates the presence of intracellular bacteria. DsRed images have been enhanced to visualize all intratumoral bacteria.
